# Supplementary material for: Termite antimicrobial defense through interaction with symbiotic microorganisms in nest materials
Source: Research Square preprint supplement (doi:10.21203/rs.3.rs-5794336/v1), 2025-01-13
Supplement: Supplementary file [file 04ae565629451ddb22813991.pdf]

## **Supplementary information**

Termite antimicrobial defense through interaction with symbiotic microorganisms in nest materials

Masaaki Nakashima<sup>1</sup>, Kenji Matsuura<sup>1\*</sup>

<sup>1</sup>Laboratory of Insect Ecology, Graduate School of Agriculture, Kyoto University, Kitashirakawa-Oiwakecho, Sakyo-ku, Kyoto 606-8502, Japan

ORCID No.

Masaaki Nakashima (0009-0003-8690-4421), Kenji Matsuura (0000-0002-9099-6694)

\*Corresponding Author:

Kenji Matsuura (Email: [matsuura.kenji.6s@kyoto-u.ac.jp](mailto:matsuura.kenji.6s@kyoto-u.ac.jp))

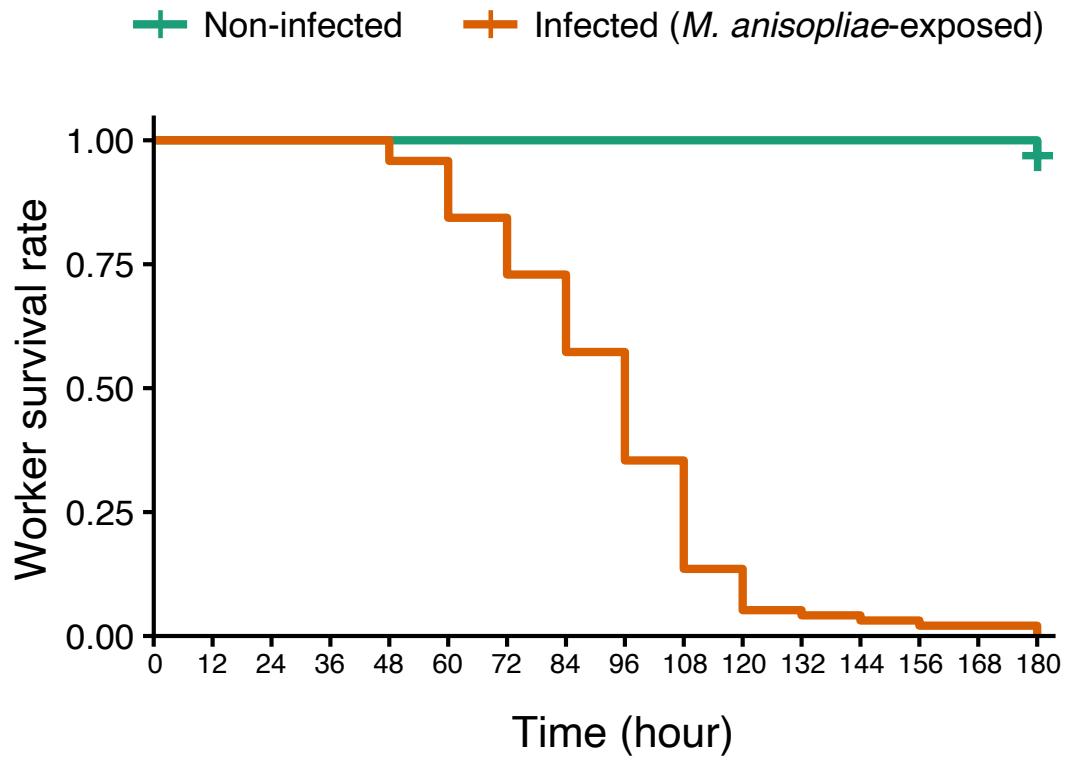

#### Supplementary figure. S1

Kaplan-Meier survival analysis of termite workers exposed to the entomopathogenic fungus *Metarhizium anisopliae* compared to non-infected workers. Workers exposed to *M. anisopliae* showed significantly reduced survival times (log-rank test,  $df = 1$ ,  $\chi^2 = 218$ ,  $P < 0.0001$ ).
